# Supplementary material for: Simultaneous CO2 capture and metal purification from waste streams using triple-level dynamic combinatorial chemistry
Source: Springer Nature journal article supplement (doi:10.1038/s41557-019-0388-5), 2020-01-13
Supplement: 41557_2019_388_MOESM42_ESM.cif [file 41557_2019_388_MOESM42_ESM.cif]

data_global 
_audit_creation_date        "2017-04-07"
_audit_creation_method CRYSTALS_ver_14.61

_oxford_structure_analysis_title  '40-2a2l in P 1 21/c 1'
_chemical_name_systematic         ?
_chemical_melting_point           ?

#looking for refcif 
 
 
# Check this file using the IUCr facility at: 
# http://checkcif.iucr.org/ 
 
# The content below is held in the file 'script/refcif.dat'. This is a text 
# file which you may edit to reflect local conditions. 
# Items which need looking at are represented by a '?'. 
# Items for which there are choices are prefixed with 'choose from'. 
 
_publ_contact_letter 
; 
 Please consider this CIF submission for 
 publication as a Short Format Paper in Acta 
 Crystallographica E. 
; 
_publ_contact_author_name         'Anthony Other' 
_publ_contact_author_address 
; 
 Chemical Crystallography Laboratory, 
 Department of Chemistry, 
 University of Nowhere, 
 Nowhere, NO1 4T, UK. 
; 
 
_publ_contact_author_phone        '+44 1865 000000' 
_publ_contact_author_fax          '+44 1865 000000' 
_publ_contact_author_email        'a.n.other@chem.no.ac.uk' 
_publ_requested_journal           'Section E' 
_publ_requested_category          EO # choose from: FI FM FO CI CM CO AD 
_publ_requested_coeditor_name     'Prof William Clegg' 
 
_publ_section_title 
# Title of paper - generally just the systematic or trivial name 
; ? 
; 
 
# The loop structure below should contain the names and addresses of all 
# authors, in the required order of publication. Repeat as necessary. 
loop_ 
 _publ_author_name 
 _publ_author_address 
 _publ_author_footnote 
 'Other, Anthony N.' # Author 1 
; 
 ? # Address for author 1 
; 
; 
 ? # Footnote for author 1 
; 
 'Else, S. O.' # Author 2 
; 
 ? # Address 2 
; 
; 
 ? # Footnote 2 
; 
 
 
_publ_section_abstract 
# Text of the abstract 
# (a) The Abstract must be self-contained and comprehensible 
# without the rest of the paper. This means no references 
# to atom names or to compound numbers; compounds must be 
# identified as the title compound, or by name or by some other 
# means such as derivatives of each other (e.g. "the 
# corresponding ketone"). 
# (b) The chemical formula of "the title compound" must be given. 
# (c) Any crystallographic molecular symmetry should be 
# mentioned, and also the presence of more than one molecule 
# in the asymmetric unit (i.e. anything other than Z'=1). 
; 
? 
; 
 
_publ_section_related_literature  # Not in version 2.3.1 
############################################################### 
# Essential references (e.g. to the origin of the material studied, related 
# structural studies, and to information supporting the reported structure) 
# should be cited in this section, with appropriate very brief explanatory 
# text, for example `The synthesis of the complex is described by Jones 
# (2001). The anhydrous complex has essentially the same coordination 
# geometry (Smith, 2003).' In addition, all references included in the 
# supplementary materials, but not elsewhere in the published article, 
# should be given here. The simple text `For related literature, see:...' 
# may be used, but further details should be provided in the Comment 
# section, which forms part of the supplementary material. 
############################################################### 
; 
? 
; 
 
_publ_section_comment 
# Text of the paper 
# Note that atoms are referenced as N2, not N(2) or N~2~ 
# If text containing () occur within (), the outer ones should be [] 
# Figures should be referenced as Fig. 
; 
? 
; 
_publ_section_acknowledgements    # Acknowledgments 
; 
? 
; 
_publ_section_figure_captions 
# Captions to figures - Start each caption on a new line after a blank line 
; 
Fig. 1. 
The title compound with displacement ellipsoids drawn at the 50% 
probability level. H atoms are shown as spheres of 
arbitary radius. 
 
; 
 
 
_publ_section_exptl_refinement 
# Some potentially useful phrases are donated by Bill Clegg: 
; 
In the absence of significant anomalous scattering, Friedel pairs were 
merged. 
 
The absolute configuration was arbitrarily assigned. 
 
The relatively large ratio of minimum to maximum corrections applied 
in the multiscan process (1:nnn) reflect changes in the illuminated 
volume of the crystal. 
 
Changes in illuminated volume were kept to a minimum, and were 
taken into account (G\"orbitz, 1999) by the multi-scan inter-frame 
scaling (DENZO/SCALEPACK, Otwinowski & Minor, 1997). 
 
 
G\"orbitz, C. H. (1999). Acta Cryst. B55, 1090-1098. 
 
 
 
 
The H atoms were all located in a difference map, but those 
attached to carbon atoms were repositioned geometrically. 
The H atoms were initially refined with soft restraints on the 
bond lengths and angles to regularise their geometry 
(C---H in the range 0.93--0.98, 
N---H in the range 0.86--0.89 
N---H to 0.86 
O---H = 0.82 
\%A) 
and 
U~iso~(H) (in the range 1.2-1.5 times U~eq~ of the parent atom), 
after which the positions were refined with riding constraints 
(Cooper et al, 2010). 
 
Cooper, R. I., Thompson, A. L. & Watkin, D. J. (2010). J. Appl. Cryst. 
43, 1100-1107. 
 
; 
 
_publ_section_exptl_prep 
# Brief details or a reference. Include solvent if known 
; 
? 
; 
 
# Hand-made tables can be put in the cif. The number of columns 
# is set in the loop header. 
# The contants of each column can either be a piece of text 
# without any spaces (eg a number) or other text enclosed in " " 
# Remove the leading # in the following example 
 
#geom_extra_table_head_A 
#; 
#Table 2. 
#Molecular parameters deviating most from MOGUL averages 
#; 
# 
#loop_ 
#_geom_extra_tableA_col_1 
#_geom_extra_tableA_col_2 
#_geom_extra_tableA_col_3 
#_geom_extra_tableA_col_4 
# 
#Parameter "Observed Value" "MOGUL Value" "MOGUL e.s.d" 
#N5-C6-C4 129 124 "7 (\%)" 
#C3-O10-C2 105 109 "2 (\%)" 
#C6-O7 1.25 1.22 ".02 (\%A)" 
# 
 
data_1 
 
_exptl_special_details 
; 
 The crystal was 
placed in the cold stream of an Oxford 
Cryosystems open-flow nitrogen cryostat (Cosier & 
Glazer, 1986) with a nominal stability of 0.1K. 
 
Cosier, J. & Glazer, A.M., 1986. J. Appl. Cryst. 105-107. 
; 
_refine_special_details 
; 
? 
; 
#--------------------------------------------------------------- 
# _oxford_ data items, April 2010: 
# There is some uncertainty about the correct way of forming local data 
# names, e.g. 
 
# _atom_site_special_shape_oxford 
# or 
# _oxford_atom_site_special_shape 
 
# see: 
# http://www.iucr.org/resources/cif/spec/version1.1/semantics#namespace 
 
# A reserved prefix, e.g. foo, must be used in the following way 
# " If the data file contains items defined in a DDL1 dictionary, the 
# local data names assigned under the reserved prefix must contain it as 
# their first component, e.g. _foo_atom_site_my_item. " 
 
# However, this seems to say the opposite: 
# http://www.iucr.org/__data/iucr/cif/standard/cifstd8.html 
 
# According to advice from the IUCr, CRYSTALS is correct 
#--------------------------------------------------------------- 
# End of 'script/refcif.dat' 
#end of refcif 
_cell_length_a                    13.3786(11)
_cell_length_b                    8.6005(8)
_cell_length_c                    13.8095(12)
_cell_angle_alpha                 90
_cell_angle_beta                  101.594(9)
_cell_angle_gamma                 90
_cell_volume                      1556.5(2)
 
_symmetry_cell_setting            'monoclinic' 
_symmetry_space_group_name_H-M    'P 21/c ' 
_symmetry_space_group_name_Hall   '-P 2ybc' 
loop_
 _symmetry_equiv_pos_as_xyz
 'x,y,z'
 '-x,-y,-z'
 'x,-y+1/2,z+1/2'
 '-x,y+1/2,-z+1/2'

loop_
_atom_type_symbol
_atom_type_scat_dispersion_real
_atom_type_scat_dispersion_imag
_atom_type_scat_Cromer_Mann_a1
_atom_type_scat_Cromer_Mann_b1
_atom_type_scat_Cromer_Mann_a2
_atom_type_scat_Cromer_Mann_b2
_atom_type_scat_Cromer_Mann_a3
_atom_type_scat_Cromer_Mann_b3
_atom_type_scat_Cromer_Mann_a4
_atom_type_scat_Cromer_Mann_b4
_atom_type_scat_Cromer_Mann_c
_atom_type_scat_source  
 C       0.0033   0.0016   2.3100  20.8439   1.0200  10.2075   1.5886   0.5687
   0.8650  51.6512   0.2156 'International Tables Vol C 4.2.6.8 and 6.1.1.4'
 H       0.0000   0.0000   0.4930  10.5109   0.3229  26.1257   0.1402   3.1424
   0.0408  57.7998   0.0030 'International Tables Vol C 4.2.6.8 and 6.1.1.4'
 O       0.0106   0.0060   3.0485  13.2771   2.2868   5.7011   1.5463   0.3239
   0.8670  32.9089   0.2508 'International Tables Vol C 4.2.6.8 and 6.1.1.4'
 Cl      0.1484   0.1585  11.4604   0.0104   7.1964   1.1662   6.2556  18.5194
   1.6455  47.7784  -9.5574 'International Tables Vol C 4.2.6.8 and 6.1.1.4'
 Co      0.3494   0.9721  12.2841   4.2791   7.3409   0.2784   4.0034  13.5359
   2.3488  71.1692   1.0118 'International Tables Vol C 4.2.6.8 and 6.1.1.4'
 Ni      0.3393   1.1124  12.8376   3.8785   7.2920   0.2565   4.4438  12.1763
   2.3800  66.3421   1.0341 'International Tables Vol C 4.2.6.8 and 6.1.1.4'
 La     -0.2871   2.4523  20.5780   2.9482  19.5990   0.2445  11.3727  18.7726
   3.2872 133.1240   2.1468 'International Tables Vol C 4.2.6.8 and 6.1.1.4'
 N       0.0061   0.0033  12.2126   0.0057   3.1322   9.8933   2.0125  28.9975
   1.1663   0.5826 -11.5290 'International Tables Vol C 4.2.6.8 and 6.1.1.4'
 
 
_cell_formula_units_Z                    4

# Given Formula = C9 Co1 La1 N3 Ni1 O8 
# Dc =      2.28 Fooo =    752.00 Mu =     49.86 M =    534.66
# Found Formula = C8 H28 Cl2 N6 Ni1 O1 
# Dc =      1.51 FOOO =    752.00 Mu =     15.90 M =    353.97

_chemical_formula_sum             'C8 H28 Cl2 N6 Ni O'
_chemical_formula_moiety          'C8 H26 N6 Ni, 2(Cl), H2 O'
_chemical_compound_source                ?
_chemical_formula_weight            353.97
 
 
_cell_measurement_temperature   100.00(10) 
_cell_measurement_reflns_used   8304
_cell_measurement_theta_min     3.1250
_cell_measurement_theta_max     29.1580
 
_exptl_crystal_description        'block' 
_exptl_crystal_colour             'purple' 
_exptl_crystal_size_min           0.347 
_exptl_crystal_size_mid           0.430 
_exptl_crystal_size_max           0.614 
 
_exptl_crystal_density_diffrn     1.510 
_exptl_crystal_density_meas       ? 
_exptl_crystal_density_method     'not measured' 
# Non-dispersive F(000): 
_exptl_crystal_F_000              752 
_exptl_absorpt_coefficient_mu     1.590 
 
# Sheldrick geometric approximatio 0.50 0.58 
_exptl_absorpt_correction_T_min                     0.549
_exptl_absorpt_correction_T_max                     0.669
_exptl_absorpt_correction_type            analytical
_exptl_absorpt_process_details
;
CrysAlisPro 1.171.38.43 (Rigaku Oxford Diffraction, 2015)
Analytical numeric absorption correction using a multifaceted crystal
			model based on expressions derived by R.C. Clark & J.S. Reid.
(Clark, R. C. & Reid, J. S. (1995). Acta Cryst. A51, 887-897)
Empirical absorption correction using spherical harmonics,
 implemented in SCALE3 ABSPACK scaling algorithm.
;
_oxdiff_exptl_absorpt_empirical_full_min           0.927
_oxdiff_exptl_absorpt_empirical_full_max           1.084
_oxdiff_exptl_absorpt_empirical_details
;
Empirical correction (ABSPACK) includes:
- Absorption correction using spherical harmonics
- Frame scaling
;
_diffrn_ambient_temperature 100.00(10) 
_diffrn_ambient_environment N~2~
_diffrn_source 'fine-focus sealed X-ray tube'
_diffrn_source_type 'Enhance (Mo) X-ray Source'
_diffrn_radiation_probe x-ray
_diffrn_radiation_type 'Mo K\a'
_diffrn_radiation_wavelength 0.71073
_diffrn_radiation_monochromator graphite
_diffrn_measurement_device 'four-circle diffractometer'
_diffrn_measurement_device_type 'Xcalibur, Atlas, Gemini ultra'
_diffrn_detector 'CCD plate'
_diffrn_detector_type Atlas
_diffrn_detector_area_resol_mean 10.4685
_diffrn_measurement_method        \w 
 
# If a reference occurs more than once, delete the author 
# and date from subsequent references. 
_computing_data_collection     'CrysAlisPro 1.171.38.43 (Rigaku OD, 2015)'
_computing_cell_refinement     'CrysAlisPro 1.171.38.43 (Rigaku OD, 2015)'
_computing_data_reduction      'CrysAlisPro 1.171.38.43 (Rigaku OD, 2015)'
_computing_structure_solution     'SIR97 (Altomare et al., 1999)' 
_computing_structure_refinement   'CRYSTALS (Betteridge et al., 2003)' 
_computing_publication_material   'CRYSTALS (Betteridge et al., 2003)' 
_computing_molecular_graphics     'CAMERON (Watkin et al., 1996)' 
 
_diffrn_standards_interval_time   . 
_diffrn_standards_interval_count  . 
_diffrn_standards_number          0 
_diffrn_standards_decay_%         ? 
 
_diffrn_reflns_number             16678 
_reflns_number_total              3858 
_diffrn_reflns_av_R_equivalents   0.048 
# Number of reflections without Friedels Law is 0 
# Number of reflections with Friedels Law is 3858 
# Theoretical number of reflections is about 8690 
 
 
_diffrn_reflns_theta_min          2.806 
_diffrn_reflns_theta_max          29.519 
_diffrn_measured_fraction_theta_max 0.890 
 
_diffrn_reflns_theta_full         25.949 
_diffrn_measured_fraction_theta_full 1.000 
 
 
_diffrn_reflns_limit_h_min        -18 
_diffrn_reflns_limit_h_max        18 
_diffrn_reflns_limit_k_min        -11 
_diffrn_reflns_limit_k_max        9 
_diffrn_reflns_limit_l_min        -19 
_diffrn_reflns_limit_l_max        18 
_reflns_limit_h_min               -18 
_reflns_limit_h_max               18 
_reflns_limit_k_min               0 
_reflns_limit_k_max               11 
_reflns_limit_l_min               0 
_reflns_limit_l_max               19 
 
_oxford_diffrn_Wilson_B_factor    1.44 
_oxford_diffrn_Wilson_scale       0.27 
 
_atom_sites_solution_primary      direct #heavy,direct,difmap,geom,iterative
# _atom_sites_solution_secondary  difmap
_atom_sites_solution_hydrogens    difmap
 
_refine_diff_density_min          -1.08 
_refine_diff_density_max          0.82 
 
 
# The current dictionary definitions do not cover the 
# situation where the reflections used for refinement were 
# selected by a user-defined sigma threshold 
 
 
# The values actually used during refinement 
_oxford_reflns_threshold_expression_ref     I>-10.0\s(I)
_refine_ls_number_reflns          3845 
_refine_ls_number_restraints      38 
_refine_ls_number_parameters      199 
_oxford_refine_ls_R_factor_ref    0.0456 
_refine_ls_wR_factor_ref          0.0727 
_refine_ls_goodness_of_fit_ref    1.0499 
_refine_ls_shift/su_max           0.0009098 
_refine_ls_shift/su_mean          0.0000337 
 
 
# The values computed with all filters except I/sigma 
_oxford_reflns_number_all         3845 
_refine_ls_R_factor_all           0.0456 
_refine_ls_wR_factor_all          0.0727 
 
# The values computed with a 2 sigma cutoff - a la SHELX 
_reflns_threshold_expression      I>2.0\s(I)
_reflns_number_gt                 3383 
_refine_ls_R_factor_gt            0.0386 
_refine_ls_wR_factor_gt           0.0644 
 
# choose from: rm (reference molecule of known chirality), 
# ad (anomolous dispersion - Flack), rmad (rm and ad), 
# syn (from synthesis), unk (unknown) or . (not applicable). 
_chemical_absolute_configuration  '.' 
 
 
_refine_ls_structure_factor_coef  Fsqd 
_refine_ls_matrix_type            full
_refine_ls_hydrogen_treatment     mixed          #undef, noref, refall,
                                                 # refxyz, refU, constr or mixed
_refine_ls_weighting_scheme       calc 
_refine_ls_weighting_details 
;
 Method, part 1, Chebychev polynomial, (Watkin, 1994, Prince, 1982) 
 [weight] = 1.0/[A~0~*T~0~(x)+A~1~*T~1~(x) ... +A~n-1~]*T~n-1~(x)] 
 where A~i~ are the Chebychev coefficients listed below and x= Fcalc/Fmax 
 Method = Robust Weighting (Prince, 1982) 
 W = [weight] * [1-(deltaF/6*sigmaF)^2^]^2^ 
 A~i~ are: 
 940. 0.131E+04 690. 133. 
;
# Insert your own references if required - in alphabetical order 
_publ_section_references 
; 
Altomare, A., Burla, M.C., Camalli, M., Cascarano, G.L., Giacovazzo, C., 
Guagliardi, A., Grazia, A., Moliterni, G., Polidori, G. & Spagna, R. 
(1999). J. App. Cryst. 32, 115-119. 
 
Betteridge, P.W., Carruthers, J.R., Cooper, R.I., 
Prout, K. & Watkin, D.J. (2003). J. Appl. Cryst. 36, 1487. 
 
Agilent (2011). CrysAlisPro. 
 
Oxford Diffraction, (2006). Gemini User Manual. 
 
Prince, E. 
Mathematical Techniques in Crystallography 
and Materials Science 
Springer-Verlag, New York, 1982. 
 
Watkin D.J. (1994). 
Acta Cryst, A50, 411-437. 
 
Watkin, D.J., Prout, C.K. & Pearce, L.J. (1996). CAMERON, Chemical 
Crystallography Laboratory, Oxford, UK. 
; 

# Uequiv = arithmetic mean of Ui i.e. Ueqiv = (U1+U2+U3)/3

# Replace last . with number of unfound hydrogen atoms attached to an atom.

# ..._refinement_flags_... 
# . no refinement constraints           S special position constraint on site
# G rigid group refinement of site      R riding atom
# D distance or angle restraint on site T thermal displacement constraints
# U Uiso or Uij restraint (rigid bond)  P partial occupancy constraint


loop_
_atom_site_label
_atom_site_type_symbol
_atom_site_fract_x
_atom_site_fract_y
_atom_site_fract_z
_atom_site_U_iso_or_equiv
_atom_site_occupancy
_atom_site_adp_type
_atom_site_refinement_flags_posn
_atom_site_refinement_flags_adp
_atom_site_refinement_flags_occupancy
_atom_site_disorder_assembly
_atom_site_disorder_group
_atom_site_attached_hydrogens
Ni1 Ni 0.26048(3) 0.61190(4) 0.56078(3) 0.0112 1.0000 Uani D . . . . . 
N2 N 0.27367(18) 0.8527(3) 0.57435(18) 0.0151 1.0000 Uani D . . . . . 
C3 C 0.3422(2) 0.9008(3) 0.5098(2) 0.0189 1.0000 Uani D . . . . . 
C4 C 0.4374(2) 0.8030(4) 0.5336(2) 0.0223 1.0000 Uani D . . . . . 
N5 N 0.41136(17) 0.6356(3) 0.53184(18) 0.0150 1.0000 Uani D . . . . . 
H51 H 0.4558(15) 0.586(2) 0.5767(15) 0.0223 1.0000 Uiso D . . . . . 
H52 H 0.4121(16) 0.598(3) 0.4731(14) 0.0221 1.0000 Uiso D . . . . . 
H42 H 0.4725 0.8300 0.6004 0.0274 1.0000 Uiso R . . . . . 
H41 H 0.4809 0.8264 0.4877 0.0269 1.0000 Uiso R . . . . . 
H31 H 0.3597 1.0115 0.5199 0.0230 1.0000 Uiso R . . . . . 
H32 H 0.3075 0.8846 0.4410 0.0228 1.0000 Uiso R . . . . . 
C6 C 0.1715(2) 0.9199(4) 0.5573(2) 0.0201 1.0000 Uani D . . . . . 
C7 C 0.1060(2) 0.8249(4) 0.6106(2) 0.0195 1.0000 Uani D . . . . . 
N8 N 0.11116(17) 0.6596(3) 0.58197(18) 0.0151 1.0000 Uani D . . . . . 
H82 H 0.0675(15) 0.642(3) 0.5261(14) 0.0228 1.0000 Uiso D . . . . . 
H81 H 0.0971(16) 0.601(2) 0.6284(15) 0.0230 1.0000 Uiso D . . . . . 
H71 H 0.1336 0.8339 0.6817 0.0237 1.0000 Uiso R . . . . . 
H72 H 0.0365 0.8628 0.5978 0.0228 1.0000 Uiso R . . . . . 
H62 H 0.1738 1.0275 0.5804 0.0234 1.0000 Uiso R . . . . . 
H61 H 0.1422 0.9159 0.4860 0.0238 1.0000 Uiso R . . . . . 
H21 H 0.3042(15) 0.874(2) 0.6365(13) 0.0235 1.0000 Uiso D . . . . . 
N9 N 0.20451(17) 0.5909(3) 0.40345(16) 0.0131 1.0000 Uani D . . . . . 
C10 C 0.1734(2) 0.4277(4) 0.3831(2) 0.0181 1.0000 Uani D . . . . . 
C11 C 0.2462(2) 0.3218(3) 0.4513(2) 0.0161 1.0000 Uani D . . . . . 
N12 N 0.24673(17) 0.3706(3) 0.55315(17) 0.0131 1.0000 Uani D . . . . . 
C13 C 0.3279(2) 0.3062(3) 0.6304(2) 0.0178 1.0000 Uani D . . . . . 
C14 C 0.3228(2) 0.3890(4) 0.7267(2) 0.0192 1.0000 Uani D . . . . . 
N15 N 0.3222(2) 0.5599(3) 0.71255(18) 0.0194 1.0000 Uani D . . . . . 
H152 H 0.3844(14) 0.599(3) 0.7315(16) 0.0293 1.0000 Uiso D . . . . . 
H151 H 0.2827(17) 0.602(3) 0.7500(15) 0.0298 1.0000 Uiso D . . . . . 
H142 H 0.3798 0.3593 0.7784 0.0230 1.0000 Uiso R . . . . . 
H141 H 0.2601 0.3589 0.7478 0.0231 1.0000 Uiso R . . . . . 
H132 H 0.3946 0.3276 0.6123 0.0212 1.0000 Uiso R . . . . . 
H131 H 0.3195 0.1940 0.6377 0.0207 1.0000 Uiso R . . . . . 
H121 H 0.1852(14) 0.344(2) 0.5678(15) 0.0203 1.0000 Uiso D . . . . . 
H112 H 0.3150 0.3327 0.4380 0.0186 1.0000 Uiso R . . . . . 
H111 H 0.2251 0.2146 0.4421 0.0189 1.0000 Uiso R . . . . . 
H102 H 0.1724 0.4012 0.3144 0.0222 1.0000 Uiso R . . . . . 
H101 H 0.1042 0.4137 0.3961 0.0216 1.0000 Uiso R . . . . . 
H92 H 0.1531(15) 0.655(2) 0.3822(15) 0.0199 1.0000 Uiso D . . . . . 
H91 H 0.2548(15) 0.612(3) 0.3707(15) 0.0203 1.0000 Uiso D . . . . . 
Cl16 Cl -0.03907(5) 0.72204(9) 0.35770(5) 0.0188 1.0000 Uani . . . . . . 
Cl17 Cl 0.40872(5) 0.55062(9) 0.29623(5) 0.0195 1.0000 Uani . . . . . . 
O18 O 0.11878(18) 0.5408(3) 0.79921(18) 0.0270 1.0000 Uani D . . . . . 
H181 H 0.094(3) 0.461(3) 0.771(3) 0.0404 1.0000 Uiso D . . . . . 
H182 H 0.071(2) 0.592(4) 0.814(3) 0.0406 1.0000 Uiso D . . . . . 
loop_
_atom_site_aniso_label
_atom_site_aniso_U_11
_atom_site_aniso_U_22
_atom_site_aniso_U_33
_atom_site_aniso_U_23
_atom_site_aniso_U_13
_atom_site_aniso_U_12
Ni1 0.01019(15) 0.01038(16) 0.01273(16) -0.00077(13) 0.00167(12) 0.00028(13) 
N2 0.0154(11) 0.0116(11) 0.0183(11) -0.0023(9) 0.0036(9) -0.0004(9) 
C3 0.0183(13) 0.0124(13) 0.0284(15) 0.0001(12) 0.0106(12) -0.0024(11) 
C4 0.0163(13) 0.0199(15) 0.0318(17) -0.0038(13) 0.0076(12) -0.0037(12) 
N5 0.0094(10) 0.0173(12) 0.0180(11) -0.0008(9) 0.0021(9) 0.0039(9) 
C6 0.0187(13) 0.0152(14) 0.0266(15) -0.0027(12) 0.0053(11) 0.0039(11) 
C7 0.0165(13) 0.0192(14) 0.0248(15) -0.0037(12) 0.0086(11) 0.0018(12) 
N8 0.0124(10) 0.0181(12) 0.0156(11) 0.0020(9) 0.0046(9) -0.0006(9) 
N9 0.0116(10) 0.0164(12) 0.0115(10) 0.0019(9) 0.0027(8) 0.0024(9) 
C10 0.0167(13) 0.0209(15) 0.0154(13) -0.0028(11) 0.0001(10) -0.0031(11) 
C11 0.0201(13) 0.0118(12) 0.0157(13) -0.0039(10) 0.0017(10) 0.0007(11) 
N12 0.0156(11) 0.0091(10) 0.0147(11) 0.0003(9) 0.0036(9) -0.0014(9) 
C13 0.0176(13) 0.0153(14) 0.0194(13) 0.0013(11) 0.0009(11) 0.0027(11) 
C14 0.0177(13) 0.0232(15) 0.0158(13) 0.0040(12) 0.0016(11) 0.0040(12) 
N15 0.0223(12) 0.0197(13) 0.0145(11) -0.0016(10) -0.0006(9) -0.0024(10) 
Cl16 0.0144(3) 0.0197(3) 0.0215(3) 0.0037(3) 0.0016(2) 0.0009(3) 
Cl17 0.0148(3) 0.0268(4) 0.0161(3) 0.0019(3) 0.0015(2) 0.0013(3) 
O18 0.0258(12) 0.0281(13) 0.0293(12) -0.0074(10) 0.0110(10) 0.0004(10) 

_refine_ls_extinction_method 
    'None'
_oxford_refine_ls_scale 3.54(3) 
loop_
 _geom_bond_atom_site_label_1
 _geom_bond_site_symmetry_1
 _geom_bond_atom_site_label_2
 _geom_bond_site_symmetry_2
 _geom_bond_distance
 _geom_bond_publ_flag
Ni1 . N2 . 2.084(2)    yes
Ni1 . N5 . 2.145(2)    yes
Ni1 . N8 . 2.116(2)    yes
Ni1 . N9 . 2.159(2)    yes
Ni1 . N12 . 2.085(2)    yes
Ni1 . N15 . 2.140(2)    yes
N2 . C3 . 1.460(3)    yes
N2 . C6 . 1.459(4)    yes
N2 . H21 . 0.893(17)    no
C3 . C4 . 1.507(4)    yes
C3 . H31 . 0.984    no
C3 . H32 . 0.981    no
C4 . N5 . 1.481(4)    yes
C4 . H42 . 0.975    no
C4 . H41 . 0.963    no
N5 . H51 . 0.876(17)    no
N5 . H52 . 0.877(17)    no
C6 . C7 . 1.496(4)    yes
C6 . H62 . 0.977    no
C6 . H61 . 0.984    no
C7 . N8 . 1.481(4)    yes
C7 . H71 . 0.980    no
C7 . H72 . 0.967    no
N8 . H82 . 0.883(17)    no
N8 . H81 . 0.866(17)    no
N9 . C10 . 1.475(4)    yes
N9 . H92 . 0.885(17)    no
N9 . H91 . 0.900(17)    no
C10 . C11 . 1.516(4)    yes
C10 . H102 . 0.972    no
C10 . H101 . 0.985    no
C11 . N12 . 1.466(3)    yes
C11 . H112 . 0.979    no
C11 . H111 . 0.965    no
N12 . C13 . 1.469(3)    yes
N12 . H121 . 0.915(17)    no
C13 . C14 . 1.521(4)    yes
C13 . H132 . 0.991    no
C13 . H131 . 0.980    no
C14 . N15 . 1.483(4)    yes
C14 . H142 . 0.969    no
C14 . H141 . 0.976    no
N15 . H152 . 0.887(18)    no
N15 . H151 . 0.889(18)    no
O18 . H181 . 0.826(18)    no
O18 . H182 . 0.839(18)    no
loop_
 _geom_angle_atom_site_label_1
 _geom_angle_site_symmetry_1
 _geom_angle_atom_site_label_2
 _geom_angle_site_symmetry_2
 _geom_angle_atom_site_label_3
 _geom_angle_site_symmetry_3
 _geom_angle
 _geom_angle_publ_flag
N2 . Ni1 . N5 . 81.75(9)    yes
N2 . Ni1 . N8 . 81.96(9)    yes
N5 . Ni1 . N8 . 163.17(9)    yes
N2 . Ni1 . N9 . 100.34(9)    yes
N5 . Ni1 . N9 . 88.25(9)    yes
N8 . Ni1 . N9 . 90.53(9)    yes
N2 . Ni1 . N12 . 177.69(9)    yes
N5 . Ni1 . N12 . 99.32(9)    yes
N8 . Ni1 . N12 . 97.11(9)    yes
N9 . Ni1 . N12 . 81.76(9)    yes
N2 . Ni1 . N15 . 96.35(10)    yes
N5 . Ni1 . N15 . 90.56(10)    yes
N8 . Ni1 . N15 . 95.42(10)    yes
N9 . Ni1 . N15 . 162.92(10)    yes
N12 . Ni1 . N15 . 81.62(9)    yes
Ni1 . N2 . C3 . 106.19(17)    yes
Ni1 . N2 . C6 . 108.63(17)    yes
C3 . N2 . C6 . 118.2(2)    yes
Ni1 . N2 . H21 . 108.0(14)    no
C3 . N2 . H21 . 107.8(13)    no
C6 . N2 . H21 . 107.8(13)    no
N2 . C3 . C4 . 108.4(2)    yes
N2 . C3 . H31 . 110.4    no
C4 . C3 . H31 . 110.0    no
N2 . C3 . H32 . 108.6    no
C4 . C3 . H32 . 110.3    no
H31 . C3 . H32 . 109.1    no
C3 . C4 . N5 . 110.7(2)    yes
C3 . C4 . H42 . 107.3    no
N5 . C4 . H42 . 108.3    no
C3 . C4 . H41 . 109.6    no
N5 . C4 . H41 . 111.3    no
H42 . C4 . H41 . 109.5    no
C4 . N5 . Ni1 . 108.47(17)    yes
C4 . N5 . H51 . 109.4(14)    no
Ni1 . N5 . H51 . 110.7(14)    no
C4 . N5 . H52 . 109.4(14)    no
Ni1 . N5 . H52 . 108.8(14)    no
H51 . N5 . H52 . 110.0(15)    no
N2 . C6 . C7 . 109.1(2)    yes
N2 . C6 . H62 . 110.8    no
C7 . C6 . H62 . 109.9    no
N2 . C6 . H61 . 108.6    no
C7 . C6 . H61 . 108.6    no
H62 . C6 . H61 . 109.9    no
C6 . C7 . N8 . 109.2(2)    yes
C6 . C7 . H71 . 108.0    no
N8 . C7 . H71 . 108.4    no
C6 . C7 . H72 . 111.2    no
N8 . C7 . H72 . 111.7    no
H71 . C7 . H72 . 108.2    no
C7 . N8 . Ni1 . 108.62(17)    yes
C7 . N8 . H82 . 110.1(14)    no
Ni1 . N8 . H82 . 108.8(14)    no
C7 . N8 . H81 . 109.5(14)    no
Ni1 . N8 . H81 . 110.0(14)    no
H82 . N8 . H81 . 109.8(16)    no
Ni1 . N9 . C10 . 107.40(16)    yes
Ni1 . N9 . H92 . 111.8(13)    no
C10 . N9 . H92 . 111.1(14)    no
Ni1 . N9 . H91 . 110.2(13)    no
C10 . N9 . H91 . 107.6(14)    no
H92 . N9 . H91 . 108.7(15)    no
N9 . C10 . C11 . 109.4(2)    yes
N9 . C10 . H102 . 111.0    no
C11 . C10 . H102 . 110.3    no
N9 . C10 . H101 . 108.7    no
C11 . C10 . H101 . 108.8    no
H102 . C10 . H101 . 108.6    no
C10 . C11 . N12 . 107.7(2)    yes
C10 . C11 . H112 . 109.6    no
N12 . C11 . H112 . 109.2    no
C10 . C11 . H111 . 110.9    no
N12 . C11 . H111 . 110.2    no
H112 . C11 . H111 . 109.1    no
C11 . N12 . Ni1 . 108.47(17)    yes
C11 . N12 . C13 . 116.7(2)    yes
Ni1 . N12 . C13 . 107.07(17)    yes
C11 . N12 . H121 . 108.1(13)    no
Ni1 . N12 . H121 . 108.1(13)    no
C13 . N12 . H121 . 108.2(13)    no
N12 . C13 . C14 . 107.6(2)    yes
N12 . C13 . H132 . 108.5    no
C14 . C13 . H132 . 109.6    no
N12 . C13 . H131 . 111.2    no
C14 . C13 . H131 . 110.2    no
H132 . C13 . H131 . 109.7    no
C13 . C14 . N15 . 110.4(2)    yes
C13 . C14 . H142 . 110.7    no
N15 . C14 . H142 . 109.9    no
C13 . C14 . H141 . 109.2    no
N15 . C14 . H141 . 108.7    no
H142 . C14 . H141 . 107.9    no
C14 . N15 . Ni1 . 109.07(18)    yes
C14 . N15 . H152 . 110.9(14)    no
Ni1 . N15 . H152 . 111.4(14)    no
C14 . N15 . H151 . 108.7(14)    no
Ni1 . N15 . H151 . 109.0(14)    no
H152 . N15 . H151 . 107.8(16)    no
H181 . O18 . H182 . 107(4)    no
loop_
 _geom_hbond_atom_site_label_D
 _geom_hbond_site_symmetry_D
 _geom_hbond_atom_site_label_H
 _geom_hbond_site_symmetry_H
 _geom_hbond_atom_site_label_A
 _geom_hbond_site_symmetry_A
 _geom_hbond_angle_DHA
 _geom_hbond_distance_DH
 _geom_hbond_distance_HA
 _geom_hbond_distance_DA
 _geom_hbond_publ_flag
N8 . H81 . O18 . 149.4(20) 0.866 2.376 3.151(4)    yes
C6 . H61 . O18 3_564 160.99(9) 0.984 2.562 3.508(4)    yes
N15 . H151 . O18 . 137.1(20) 0.889 2.480 3.190(4)    yes


_iucr_refine_instructions_details
;
#
# Punched on 07/04/17 at 11: 4: 6
#
#LIST     12                                                                    
BLOCK 
CONT SCALE 
CONT NI   (    1 ,X'S,U'S)  UNTIL N    (    5 ) 
CONT H    (   51 ,X'S)  UNTIL H    (   52 ) 
CONT C    (    6 ,X'S,U'S)  UNTIL N    (    8 ) 
CONT H    (   82 ,X'S)  UNTIL H    (   81 ) 
CONT H    (   21 ,X'S) 
CONT N    (    9 ,X'S,U'S)  UNTIL N    (   15 ) 
CONT H    (  152 ,X'S)  UNTIL H    (  151 ) 
CONT H    (  121 ,X'S) 
CONT H    (   92 ,X'S)  UNTIL H    (   91 ) 
CONT CL   (   16 ,X'S,U'S)  UNTIL O    (   18 ) 
CONT H    (  181 ,X'S)  UNTIL H    (  182 ) 
RIDE C   (   3,X'S) H   (  31,X'S) H   (  32,X'S) 
RIDE C   (   4,X'S) H   (  42,X'S) H   (  41,X'S) 
RIDE C   (   6,X'S) H   (  62,X'S) H   (  61,X'S) 
RIDE C   (   7,X'S) H   (  71,X'S) H   (  72,X'S) 
RIDE C   (  10,X'S) H   ( 102,X'S) H   ( 101,X'S) 
RIDE C   (  11,X'S) H   ( 112,X'S) H   ( 111,X'S) 
RIDE C   (  13,X'S) H   ( 132,X'S) H   ( 131,X'S) 
RIDE C   (  14,X'S) H   ( 142,X'S) H   ( 141,X'S) 
END                                                                             
#
# Punched on 07/04/17 at 11: 4: 6
#
#LIST     16                                                                    
NO 
REM   HREST   START (DO NOT REMOVE THIS LINE) 
REM NO H   NO #H U MULT DIST 
REM C-H 
REM >4           1.5    .96 DISORDER 
REM 1      1     1.2    .93 C C-H (ACETYLENE) 
REM 1      2     1.2    .93 C-C(H)-C 
REM 1      3     1.2    .98 (C)3-C-H 
REM 2      1     1.2    .93 C=C-H(2) 
REM 2      2     1.2    .97 (C)2-C-(H)2 
REM 3      1     1.5    .96 C-C-(H)3 
REM N-H 
REM >4           1.5    .89 DISORDER 
REM 1      1     1.2    .86 N-N/H 
REM 1      2     1.2    .86 (C)2-N-H 
REM 1      3     1.2    .89 (C)3-N-H 
REM 2      1     1.2    .86 C-N-(H)2 
REM 2      2     1.2    .89 (C)2-N-(H)2 
REM 3      1     1.2    .89 C-H-(H)3 
REM O-H 
REM 1      1     1.5    .82 O-H 
REM 
REM DIST      ESD = 0.02 
REM VIB       ESD = 0.002 
REM ANGLE     ESD = 2.0 
REM POSSIBLY DISORDERED, NO OF H ATOMS=     1 
DIST 0.89, 0.02 = 
CONT N ( 2) TO H(21) 
REST 0.023, 0.002 = H(21,U[ISO]) 
ANGLE 109.54, 2.0 = 
CONT NI(1) TO N ( 2) TO H(21) 
CONT C(3) TO N ( 2) TO H(21) 
CONT C(6) TO N ( 2) TO H(21) 
REM POSSIBLY DISORDERED, NO OF H ATOMS=     2 
DIST 0.89, 0.02 = 
CONT N ( 5) TO H(51) 
CONT N ( 5) TO H(52) 
REST 0.023, 0.002 = H(51,U[ISO]) 
REST 0.023, 0.002 = H(52,U[ISO]) 
ANGLE 109.54, 2.0 = 
CONT C(4) TO N ( 5) TO H(51) 
CONT C(4) TO N ( 5) TO H(52) 
CONT NI(1) TO N ( 5) TO H(51) 
CONT NI(1) TO N ( 5) TO H(52) 
ANGLE 0.0, 2.0 = MEAN H(51) TO N ( 5) TO H(52) 
REM POSSIBLY DISORDERED, NO OF H ATOMS=     2 
DIST 0.89, 0.02 = 
CONT N ( 8) TO H(82) 
CONT N ( 8) TO H(81) 
REST 0.023, 0.002 = H(82,U[ISO]) 
REST 0.023, 0.002 = H(81,U[ISO]) 
ANGLE 109.54, 2.0 = 
CONT C(7) TO N ( 8) TO H(82) 
CONT C(7) TO N ( 8) TO H(81) 
CONT NI(1) TO N ( 8) TO H(82) 
CONT NI(1) TO N ( 8) TO H(81) 
ANGLE 0.0, 2.0 = MEAN H(82) TO N ( 8) TO H(81) 
REM POSSIBLY DISORDERED, NO OF H ATOMS=     2 
DIST 0.89, 0.02 = 
CONT N ( 9) TO H(92) 
CONT N ( 9) TO H(91) 
REST 0.020, 0.002 = H(92,U[ISO]) 
REST 0.020, 0.002 = H(91,U[ISO]) 
ANGLE 109.54, 2.0 = 
CONT NI(1) TO N ( 9) TO H(92) 
CONT NI(1) TO N ( 9) TO H(91) 
CONT C(10) TO N ( 9) TO H(92) 
CONT C(10) TO N ( 9) TO H(91) 
ANGLE 0.0, 2.0 = MEAN H(92) TO N ( 9) TO H(91) 
REM POSSIBLY DISORDERED, NO OF H ATOMS=     1 
DIST 0.89, 0.02 = 
CONT N ( 12) TO H(121) 
REST 0.020, 0.002 = H(121,U[ISO]) 
ANGLE 109.54, 2.0 = 
CONT C(11) TO N ( 12) TO H(121) 
CONT NI(1) TO N ( 12) TO H(121) 
CONT C(13) TO N ( 12) TO H(121) 
REM POSSIBLY DISORDERED, NO OF H ATOMS=     2 
DIST 0.89, 0.02 = 
CONT N ( 15) TO H(152) 
CONT N ( 15) TO H(151) 
REST 0.029, 0.002 = H(152,U[ISO]) 
REST 0.029, 0.002 = H(151,U[ISO]) 
ANGLE 109.54, 2.0 = 
CONT C(14) TO N ( 15) TO H(152) 
CONT C(14) TO N ( 15) TO H(151) 
CONT NI(1) TO N ( 15) TO H(152) 
CONT NI(1) TO N ( 15) TO H(151) 
ANGLE 0.0, 2.0 = MEAN H(152) TO N ( 15) TO H(151) 
REM       H ON O-HETRO ATOM 
DIST 0.82, 0.02 = 
CONT O ( 18) TO H(181) 
CONT O ( 18) TO H(182) 
REST 0.041, 0.002 = H(181,U[ISO]) 
REST 0.041, 0.002 = H(182,U[ISO]) 
REM   HREST   END (DO NOT REMOVE THIS LINE) 
END                                                                             
;
