# Supplementary material for: Simultaneous CO2 capture and metal purification from waste streams using triple-level dynamic combinatorial chemistry
Source: Springer Nature journal article supplement (doi:10.1038/s41557-019-0388-5), 2020-01-13
Supplement: 41557_2019_388_MOESM44_ESM.mol [file 41557_2019_388_MOESM44_ESM.mol]

nchem.18102310C-compNi(C0)2Cl2.mol
  ChemDraw11051911082D

 17 12  0  0  0  0  0  0  0  0999 V2000
    2.5135    0.6310    0.0000 Cl  0  5  0  0  0  0  0  0  0  0  0  0
    2.5419   -0.0218    0.0000 Cl  0  5  0  0  0  0  0  0  0  0  0  0
    0.7150    0.5762    0.0000 N   0  0  0  0  0  0  0  0  0  0  0  0
    0.7194   -0.5450    0.0000 N   0  0  0  0  0  0  0  0  0  0  0  0
   -0.3605   -1.2619    0.0000 N   0  0  0  0  0  0  0  0  0  0  0  0
    1.4039    0.4331    0.0000 C   0  0  0  0  0  0  0  0  0  0  0  0
    1.5147   -0.3563    0.0000 C   0  0  0  0  0  0  0  0  0  0  0  0
    1.2045   -1.2123    0.0000 C   0  0  0  0  0  0  0  0  0  0  0  0
    0.4452   -1.6918    0.0000 C   0  0  0  0  0  0  0  0  0  0  0  0
   -1.8129   -0.7576    0.0000 N   0  0  0  0  0  0  0  0  0  0  0  0
   -1.6037    0.6049    0.0000 N   0  0  0  0  0  0  0  0  0  0  0  0
   -0.3605    1.1832    0.0000 N   0  0  0  0  0  0  0  0  0  0  0  0
   -1.9075    1.2969    0.0000 C   0  0  0  0  0  0  0  0  0  0  0  0
   -1.2154    1.6918    0.0000 C   0  0  0  0  0  0  0  0  0  0  0  0
   -2.4508    0.3757    0.0000 C   0  0  0  0  0  0  0  0  0  0  0  0
   -2.5419   -0.3533    0.0000 C   0  0  0  0  0  0  0  0  0  0  0  0
   -0.4456   -0.0242    0.0000 Ni  0  2  0  0  0  0  0  0  0  0  0  0
  3  6  1  0      
  4  7  1  0      
  6  7  1  0      
  4  8  1  0      
  8  9  1  0      
  5  9  1  0      
 11 13  1  0      
 13 14  1  0      
 14 12  1  0      
 15 11  1  0      
 15 16  1  0      
 16 10  1  0      
M  CHG  3   1  -1   2  -1  17   2
M  STY  1   1 SUP
M  SLB  1   1   1
M  SAL   1  1   1
M  SMT   1  Cl
M  STY  1   2 SUP
M  SLB  1   2   2
M  SAL   2  1   2
M  SMT   2  Cl
M  END
